# Supplementary material for: The dynamic clustering of insulin receptor underlies its signaling and is disrupted in insulin resistance
Source: PubMed Central journal article supplement (PMC9727033; doi:10.1038/s41467-022-35176-7), 2022-12-06
Supplement: 41467_2022_35176_MOESM1_ESM.pdf [file 41467_2022_35176_MOESM1_ESM.pdf]

1 Supplementary Material for:

2 **The dynamic clustering of insulin receptor underlies its signaling and is**  
3 **disrupted in insulin resistance**

4 Alessandra Dall'Agnese<sup>#</sup>, Jesse M. Platt<sup>#</sup>, Ming M. Zheng, Max Friesen, Giuseppe  
5 Dall'Agnese, Alyssa M. Blaise, Jessica B. Spinelli, Jonathan E. Henninger, Erin N.  
6 Tevonian, Nancy M. Hannett, Charalampos Lazaris, Hannah K Drescher, Lea M  
7 Bartsch, Henry R. Kilgore, Rudolf Jaenisch, Linda G. Griffith, Ibrahim I. Cisse, Jacob F.  
8 Jeppesen, Tong Ihn Lee<sup>\*</sup>, Richard A. Young<sup>\*</sup>

9  
10 <sup>#</sup>these authors contributed equally

11 <sup>\*</sup>Correspondance to [young@wi.mit.edu](mailto:young@wi.mit.edu) and [tlee@wi.mit.edu](mailto:tlee@wi.mit.edu)

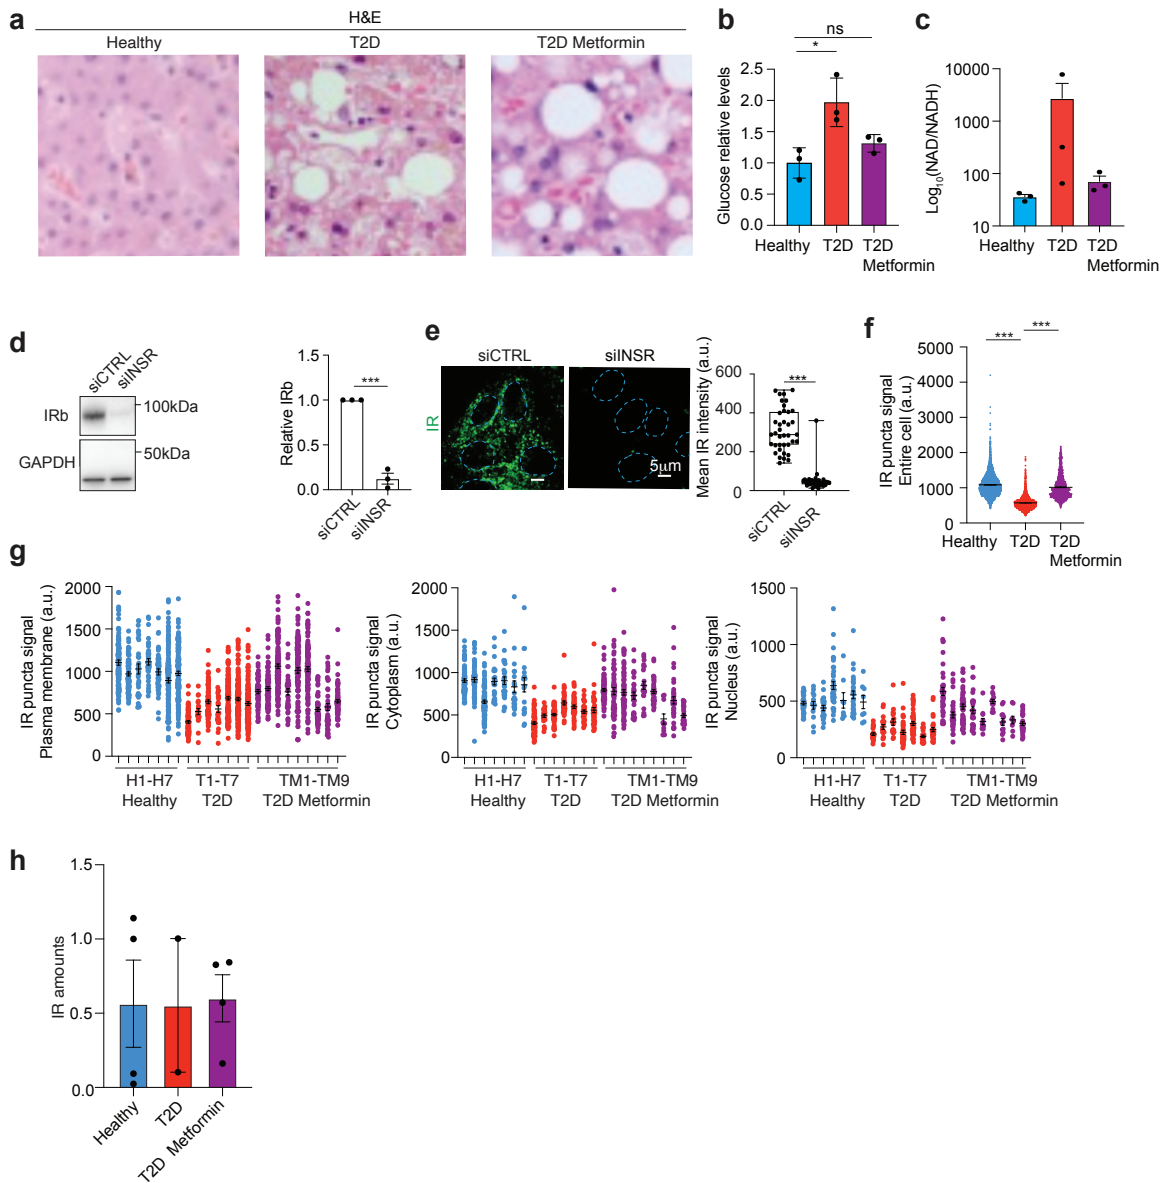

19

20

21

22

23

24

25

26

27

28

29

**Supplementary Fig. 1. Human liver characterization and antibody validation.** **a**, Representative hematoxylin and eosin (H&E) images of human livers from a healthy donor (Healthy), a donor with T2D (T2D) and a donor with T2D who had been treated with metformin (T2D Metformin). **b**, Quantification of relative glucose levels in livers from healthy donors (Healthy, light blue), donors with T2D (T2D, red) and donors with T2D who had been treated with metformin (T2D Metformin, purple) as determined by metabolomics. Data is represented as individual values and as mean +/- SEM. Liver samples from 3 donors were analyzed per condition. Unpaired two-sided t-test was used for statistical analysis. **c**, Quantification of NAD/NADH ratio in livers from healthy donors (Healthy, light blue), donors with T2D (T2D, red) and donors with T2D who had been

30 treated with metformin (T2D Metformin, purple) as determined by metabolomics. Data is  
31 represented as individual values and as mean +/- SEM. Liver samples from 3 donors  
32 were analyzed per condition. **d,e**, Validation of the antibody against IR by immunoblot (d)  
33 and immunofluorescence (e) and quantification. Data is represented as individual values  
34 and as mean +/- SEM. For immunoblot validation, 3 biological replicates were analyzed  
35 per condition. For immunofluorescence validation, 38 siCTRL cells and 36 siINSR cells  
36 were analyzed. Unpaired two-sided t-test was used for statistical analysis. siCTRL minima  
37 142, maxima 518, centre 288, 25<sup>th</sup> percentile 235, 75<sup>th</sup> percentile 404; siINSR minima 13,  
38 maxima 360, centre 41, 25<sup>th</sup> percentile 31; 75<sup>th</sup> percentile 51. **f**, Automated quantification  
39 of IR signal in puncta in entire cells (without specifying cellular subcompartments) of  
40 healthy donors (Healthy, light blue), donors with T2D (T2D, red) and donors with T2D  
41 who had been treated with metformin (T2D Metformin, purple). Data is represented as  
42 mean +/- SEM. Number of IR puncta analyzed: Healthy 5891 puncta, T2D 3118 puncta,  
43 T2D Metformin 1271. Unpaired two-sided t-test was used for statistical analysis. **g**,  
44 Quantification of IR signal in puncta at the plasma membrane, cytoplasm and nucleus in  
45 healthy donors (H1-H7, Healthy, light blue), donors with T2D (T1-T7, T2D, red) and  
46 donors with T2D who had been treated with metformin (TM1-TM9, T2D Metformin,  
47 purple). Quantification for each individual donor is shown. Data is represented as mean  
48 +/- SEM. Number of puncta analyzed: Plasma membrane, going from left (sample H1) to  
49 right (sample TM9) along the x-axis = 97, 69, 31, 36, 45, 147, 135, 70, 19, 74, 24, 135,  
50 161, 135, 54, 77, 138, 37, 120, 118, 57, 41, 74; Cytoplasm, going from left (sample H1) to  
51 right (sample TM9) along the x-axis = 68, 55, 91, 26, 25, 21, 18, 69, 20, 52, 37, 38, 30,  
52 37, 67, 57, 68, 28, 22, 36, 10, 38, 24; Nucleus, going from left (sample H1) to right (sample  
53 TM9) along the x-axis = 26, 13, 19, 36, 8, 27, 8, 21, 19, 17, 36, 44, 21, 29, 38, 31, 44, 27,  
54 12, 13, 12, 9, 25. **h**, Quantification of relative IR levels by immunoblot. IR level was  
55 normalized to CK18 and represented relative to sample Healthy 3 (H3). Data is  
56 represented as mean +/- SEM. Number of liver samples analyzed: Healthy 4 liver  
57 samples, T2D 2 liver samples, T2D Metformin 4 liver samples. Source data are provided  
58 as a Source Data file.

59

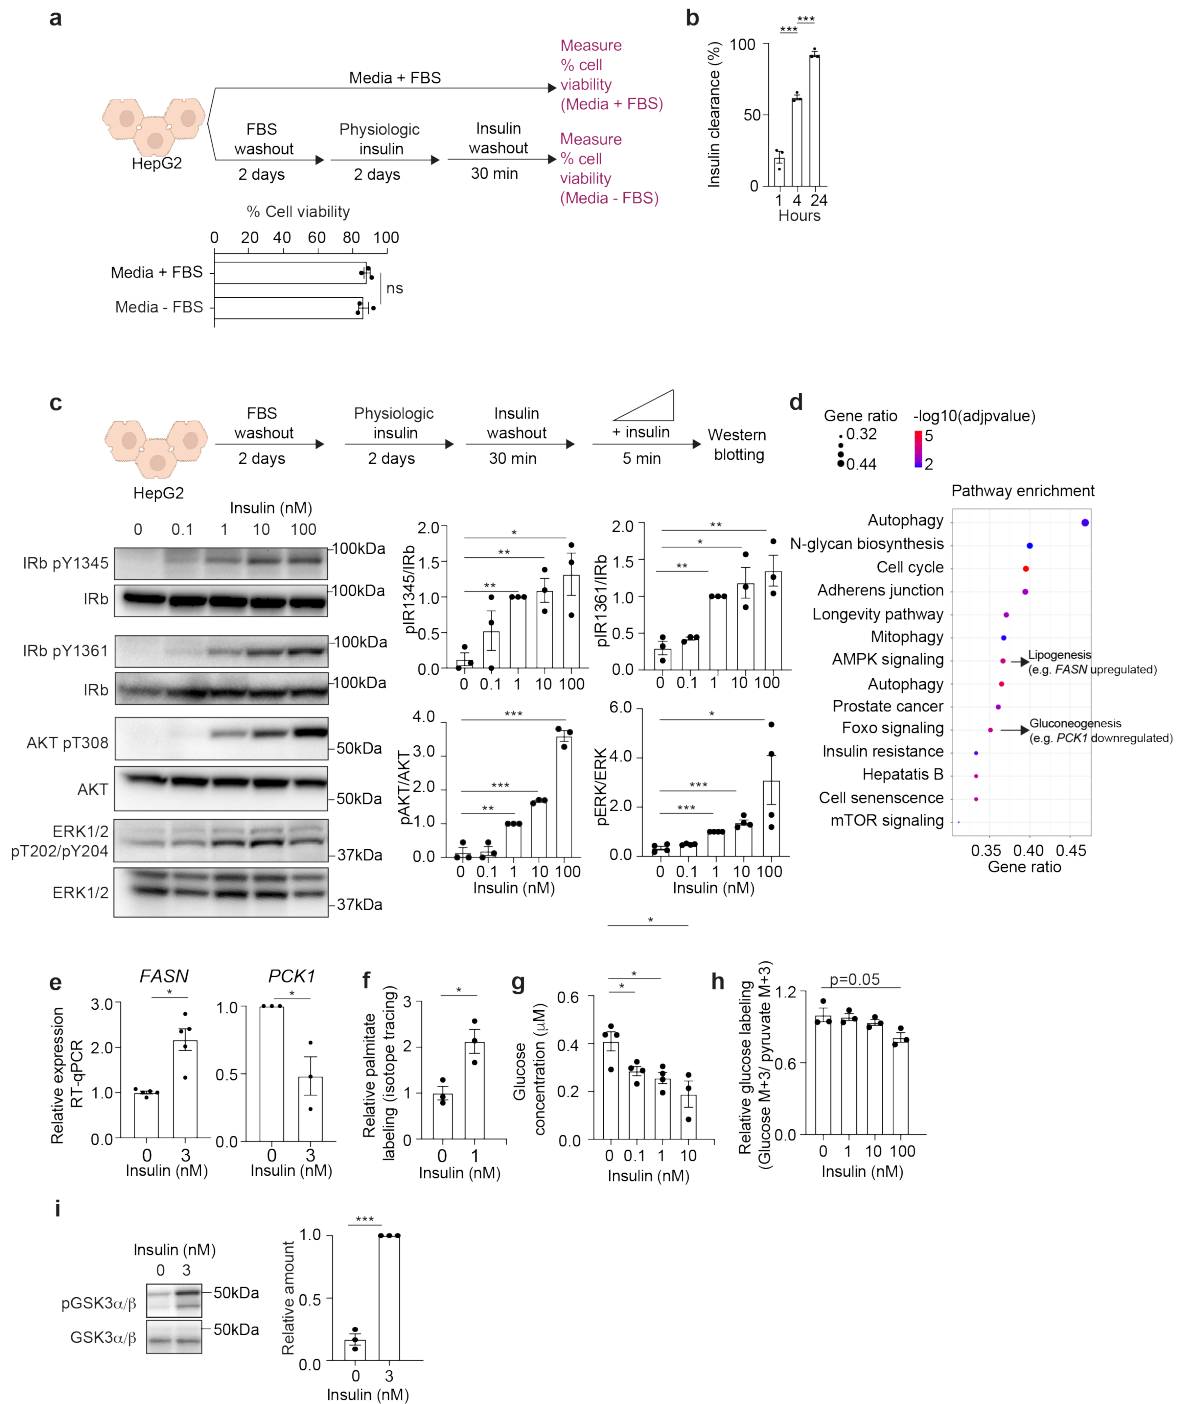

60

61

62

63

64

65

66

**Supplementary Fig. 2. Validation of insulin-sensitive HepG2 cell model.** **a**, Schematic of cell treatment (top). Percent viability of cells cultured in cell expansion media (Media + FBS, n=3 biological replicates) or in media containing physiological concentrations of insulin (Media – FBS, n=3 biological replicates) is reported in the graph (bottom). Data is reported as mean +/- SEM. Unpaired two-sided t-test was used for statistical analysis. **b**, Quantification of insulin clearance at 1, 5 or 24 hours in insulin-

67 sensitive cells treated with 3nM insulin (1 hours, n=3 biological replicates; 5 hours, n=3  
68 biological replicates, 24 hours n=3 biological replicates). Data is reported as mean +/-  
69 SEM. Unpaired two-sided t-test was used for statistical analysis. **c**, Experimental protocol  
70 (top) and immunoblot with quantitation (bottom) to measure phosphorylated insulin  
71 signaling proteins (pIRb, pAKT, pERK) over total insulin signaling proteins (IRb, AKT,  
72 ERK). 3 biological replicates per condition were analyzed for pIR/IR and for pAKT/AKT,  
73 4 biological replicates were analyzed for pERK/ERK. Data is represented as mean +/-  
74 SEM. Unpaired two-sided t-test was used for statistical analysis. **d**, Gene ontology of the  
75 differentially expressed genes after 4 hours of 3nM insulin stimulation (3 biological  
76 replicates). The y-axis corresponds to the KEGG pathways. The x-axis and the point size  
77 represent the "Gene Ratio" defined as the fraction of differentially expressed genes in  
78 each given ontology term (in this case KEGG pathway). The color corresponds to -  
79  $\log_{10}$ (adjusted p-value). **e**, Relative expression of *FASN* (n=5 biological replicates) and  
80 *PCK1* (n=3 biological replicates) in HepG2 cells acutely stimulated with (3) or without (0)  
81 insulin for 4 hours. Data is represented as mean +/- SEM. Two-sided unpaired t-test was  
82 used for statistical analysis. **f**, Isotope tracing experiment showing relative palmitate  
83 labeling in HepG2 cells acutely stimulated with 0nM or 1nM insulin for 36 hours. Data is  
84 represented as mean +/- SEM. 3 biological replicates were analyzed per condition and  
85 two-sided unpaired t-test was used for statistical analysis. **g**, Quantification of glucose  
86 production in cells stimulated with 0, 0.1, 1 or 10nM insulin for 5 hours. Data is  
87 represented as mean +/- SEM. 4 biologically independent samples were analyzed for  
88 conditions 0nM insulin, 0.1nM insulin and 1nM insulin, while 3 biologically independent  
89 samples were analyzed for condition 10nM insulin. Two-sided unpaired t-test was used  
90 for statistical analysis. **h**, Isotope tracing experiment showing relative glucose labeling in  
91 HepG2 cells acutely stimulated with 0, 1, 10 or 100nM insulin for 24 hours. Data is  
92 represented as mean +/- SEM. 3 biological replicates were analyzed per condition and  
93 unpaired two-sided t-test was used for statistical analysis. **i**, Immunoblot to quantify  
94 phosphorylated GSK $\alpha/\beta$  (pGSK $\alpha/\beta$ ) over total GSK $\alpha/\beta$  protein in HepG2 cells acutely  
95 stimulated with 0nM or 3nM insulin for 5 minutes. 3 biological replicates were analyzed  
96 per condition, data is represented as mean +/- SEM and unpaired two-sided t-test was  
97 used for statistical analysis. This is the same experiment as in Supplementary Fig. 6j.  
98 Source data are provided as a Source Data file.

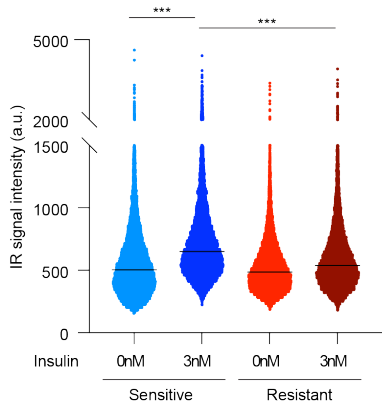

99  
 100  
 101  
 102  
 103  
 104  
 105  
 106  
 107  
 108  
 109  
 110  
 111  
 112  
 113  
 114  
 115  
 116

**Supplementary Fig. 3. Automated quantification of IR signal intensity in puncta. a,** Quantification of IR signal intensity in puncta in entire cells (without specifying cellular subcompartments), relative to Fig. 2b. Data is represented as individual values and mean +/- SEM. Number of IR puncta analyzed: Sensitive 0nM insulin (light blue) 16,984 puncta, Sensitive 3nM insulin (blue) 16,397 puncta, Resistant 0nM insulin (red) 15,296 puncta, Resistant 3nM insulin (dark red) 14,708 puncta. Unpaired two-sided t-test was used for statistical analysis. Source data are provided as a Source Data file.

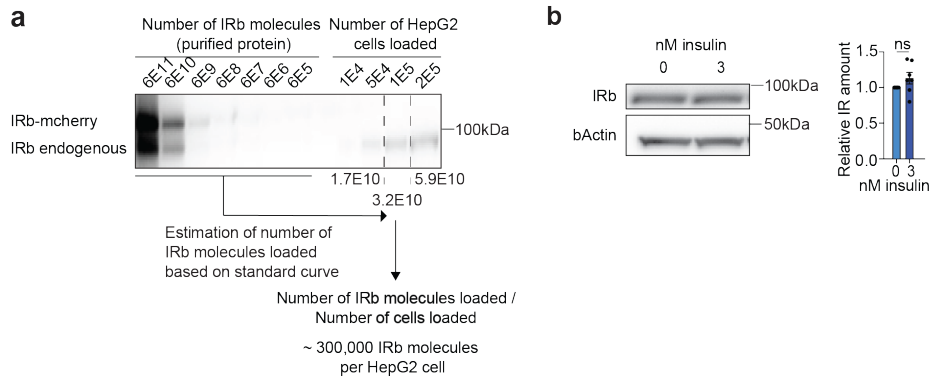

117

118

**Supplementary Fig. 4. Quantification of the number of IR molecules in HepG2 cells.**

119

**a**, Quantitative western blot with standard curve of purified IRbeta mCherry fusion protein

120

(IRb-mCherry; first 7 lanes) and cell lysate containing a specific number of cells (last four

121

lanes). **b**, Immunoblot for IRbeta (IRb) and beta-actin (bActin) in cells treated acutely with

122

0nM or 3nM insulin (left). Quantification of relative IRb levels in HepG2 cells without (0nM,

123

light blue) and with (3nM, dark blue) acute insulin stimulation (right). IRb level was

124

normalized to beta-actin. 7 biological replicates were analyzed per condition. Data is

125

represented as individual values and as mean +/- SEM. Unpaired two-sided t-test was

126

used for statistical analysis. Source data are provided as a Source Data file.

127

128

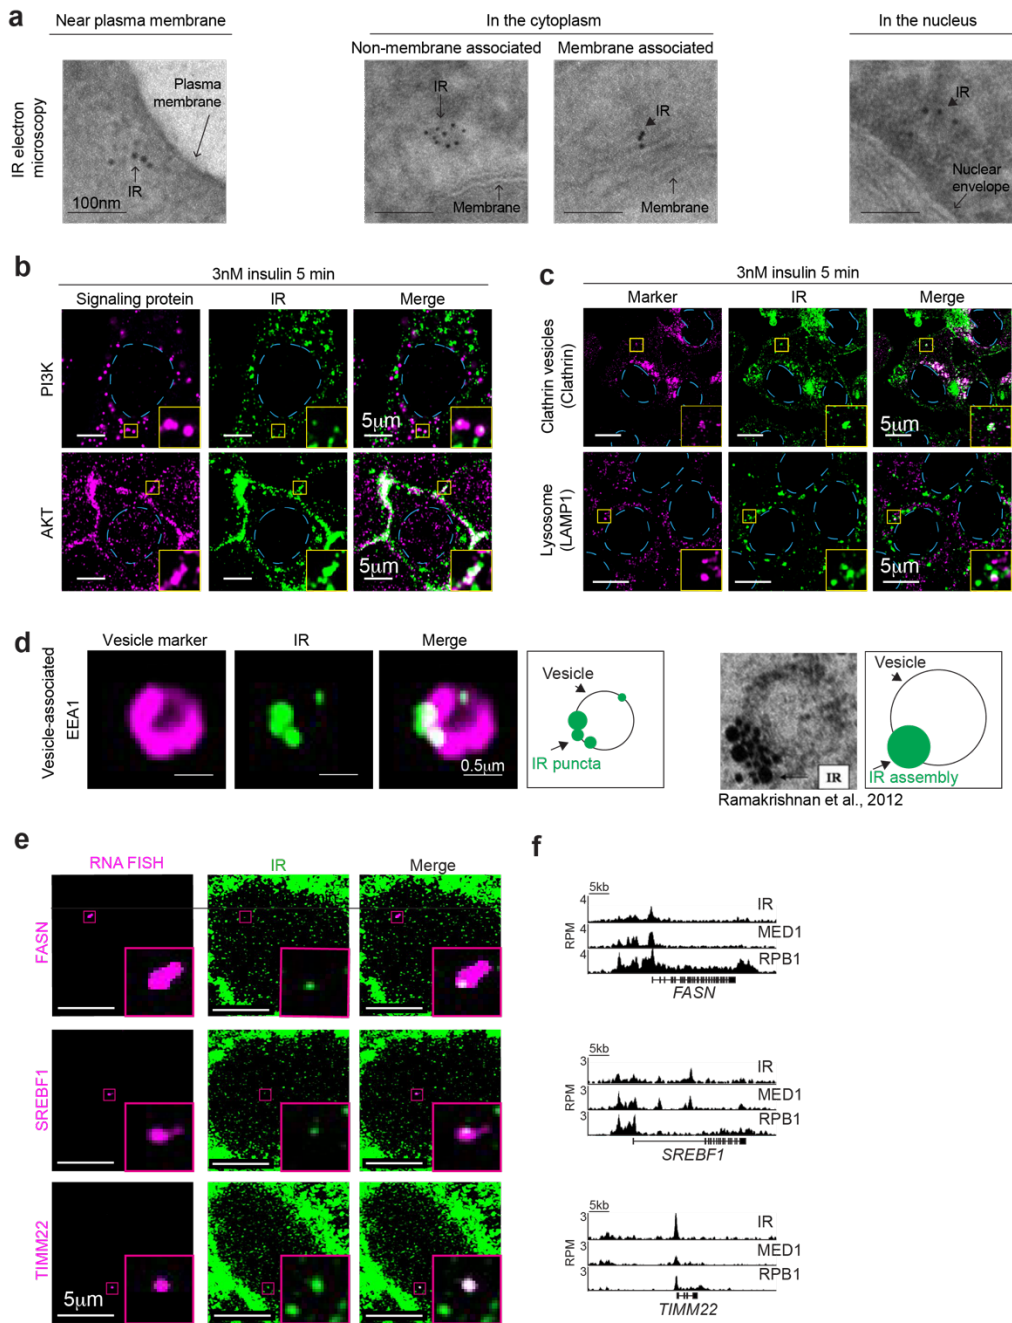

129

130

131

132

133

134

135

136

**Supplementary Fig. 5. IR puncta in various cellular compartments in insulin-sensitive cells.** **a**, Representative electron microscopy images for IR showing its presence near the plasma membrane, in the cytoplasm and in the nucleus. **b**, Representative immunofluorescence images for PI3K or AKT (magenta) together with IR (green) in insulin-sensitive HepG2 cells acutely stimulated with insulin for 5 minutes. Dashed light blue lines represent nuclear outline. Representative colocalization area (yellow box) is magnified at the bottom right corner of each image. **c**, Representative



137 immunofluorescence images for clathrin or LAMP1 together with IR (green) in insulin-  
138 sensitive HepG2 cells acutely stimulated with insulin for 5 minutes. IR was detected either  
139 by immunofluorescence or by imaging endogenous IR-GFP. Dashed light blue lines  
140 represent nuclear outline. Representative colocalization area (yellow box) is magnified at  
141 the bottom right corner of each image. **d**, Representative immunofluorescence images  
142 for EEA1 (endosome marker) and IR, with a schematic representation of IR puncta  
143 associated with a portion of the vesicle membrane (left). Published electron microscopy  
144 image of IR and another receptor associated with a portion of the membrane of a vesicle<sup>1</sup>,  
145 with a schematic representation of IR puncta associated with the vesicle (right). Reuse of  
146 the published image<sup>1</sup> is granted under STM guidelines. **e**, Colocalization of IR and  
147 nascent RNA of *FASN*, *SREBF1* and *TIMM22* determined by imaging IR-GFP and *FASN*,  
148 *SREBF1* and *TIMM22* intronic RNA FISH in cells stimulated with 3nM insulin.  
149 Colocalization area (magenta box) is magnified at the bottom right corner of each image.  
150 Scale bars are indicated in the images. *FASN*, *SREBF1* and *TIMM22* are known insulin-  
151 responsive genes<sup>2, 3, 4, 5, 6, 7</sup>. If the fluorescence made the scale bar hard to see, a black  
152 box was added behind the scale bar. **f**, ChIP-seq tracks of IR, MED1 and RPB1 at *FASN*,  
153 *SREBF1* and *TIMM22* loci.

154

155

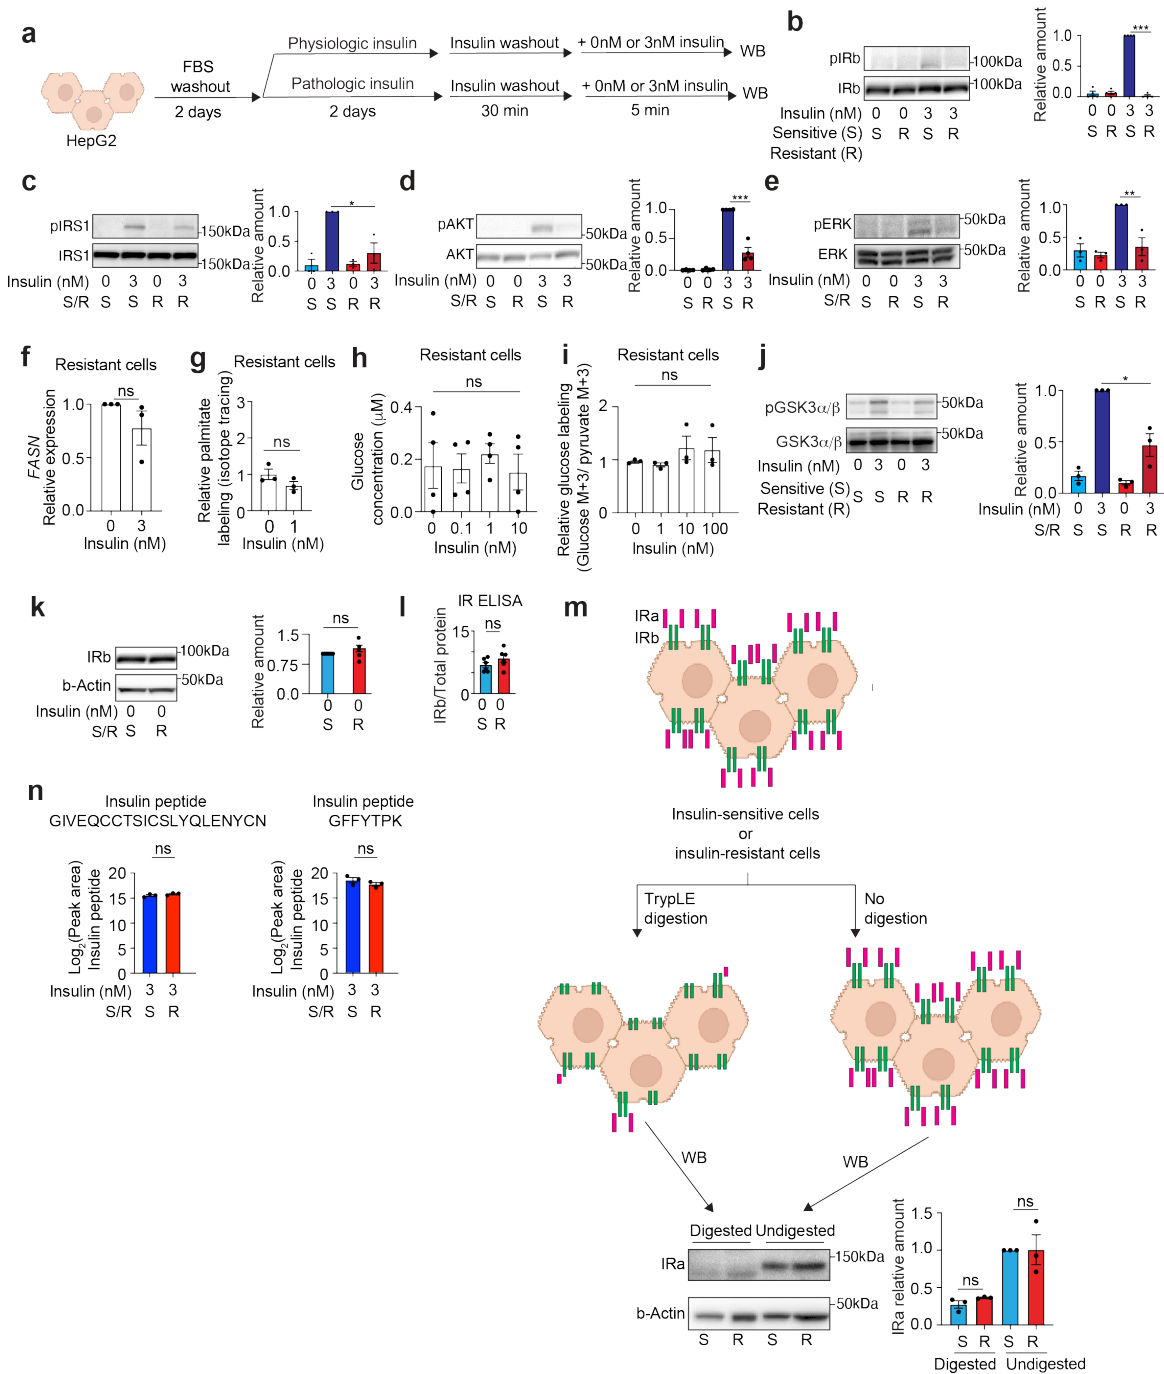

156

157

158

159

160

161

162

**Supplementary Fig. 6. Validation of insulin-resistant HepG2 cell model.** **a**, Schematic of cell treatments. **b-e**, Immunoblot with quantitation to measure phosphorylated insulin signaling proteins (pIRb, pIRS1, pAKT, pERK) over total insulin signaling proteins (IRb, IRS1, AKT, ERK) in insulin-sensitive (Sensitive, S, light blue) and insulin-resistant (Resistant, R, red) cells stimulated with 0nM (light color) or 3nM (dark color) insulin for 5 minutes. For figures b and d four biological replicates were analyzed, for figures c and e

163 three biological replicates were analyzed. Individual replicates are shown in the graphs  
164 and bar graphs represent mean +/- SEM. Unpaired two-sided t-test was used for  
165 statistical analysis. **f**, Relative expression of *FASN* in insulin-resistant HepG2 cells acutely  
166 stimulated with 0nM or 3nM insulin for 4 hours. 3 biological replicates were analyzed.  
167 Individual data points are represented as well as the mean +/- SEM. Unpaired two-sided  
168 t-test was used for statistical analysis. **g**, Isotope tracing experiment showing relative  
169 palmitate labeling in insulin-resistant HepG2 cells acutely stimulated with 0nM or 1nM  
170 insulin for 36 hours. 3 biological replicates were analyzed. Individual values are reported,  
171 bar graph represents mean +/- SEM. Unpaired two-sided t-test was used for statistical  
172 analysis. **h**, Quantification of glucose production in insulin-resistant HepG2 cells  
173 stimulated with 0, 0.1, 1 or 10nM insulin for 5 hours. 4 biological replicates were analyzed.  
174 Individual values are reported, bar graph represents mean +/- SEM. Unpaired two-sided  
175 t-test was used for statistical analysis. **i**, Isotope tracing experiment showing relative  
176 glucose labeling in insulin-resistant HepG2 cells acutely stimulated with 0, 1, 10 or 100nM  
177 insulin for 24 hours. 3 biological replicates were analyzed. Individual values are reported,  
178 bar graph represents mean +/- SEM. Unpaired two-sided t-test was used for statistical  
179 analysis. **j**, Immunoblot to quantify phosphorylated GSK $\alpha/\beta$  (pGSK $\alpha/\beta$ ) over total GSK $\alpha/\beta$   
180 protein in insulin-sensitive (Sensitive, S, blue) and insulin-resistant (Resistant, R, red)  
181 HepG2 cells acutely stimulated with 0nM (light color) or 3nM (dark color) insulin for 5  
182 minutes. 3 biological replicates were analyzed. Individual values are reported, bar graph  
183 represents mean +/- SEM. Unpaired two-sided t-test was used for statistical analysis. **k**,  
184 Immunoblot for IRbeta (IRb) and beta-actin (b-Actin) in insulin-sensitive (light blue) and  
185 insulin-resistant (red) cells unstimulated with insulin (left). Quantification of relative IRb  
186 levels (right). 5 biological replicates were analyzed. Individual values are reported, bar  
187 graph represents mean +/- SEM. Unpaired two-sided t-test was used for statistical  
188 analysis. **l**, Enzyme-linked immunoassay (ELISA) for IRbeta (IRb) relative to total protein  
189 in insulin-sensitive (S, light blue) and insulin-resistant (R, red) cells unstimulated with  
190 insulin. 6 biological replicates were analyzed. Individual values are reported, bar graph  
191 represents mean +/- SEM. Unpaired two-sided t-test was used for statistical analysis. **m**,  
192 Schematic of proteolytic shaving experiment. Insulin-sensitive or resistant cells were  
193 either treated with TrypLE to digest the portions of proteins at the cell surface (Digested)  
194 or not (Undigested). Immunoblot with quantitation to measure IRalpha (IRa) and beta-

195 actin (b-Actin) in digested and undigested insulin-sensitive (S, light blue) and insulin-  
196 resistant (R, red) cells. 3 biological replicates were analyzed. Individual values are  
197 reported, bar graph represents mean +/- SEM. Unpaired two-sided t-test was used for  
198 statistical analysis. **n**, Proteomic quantification of insulin binding in insulin-sensitive (S,  
199 blue) and insulin-resistant (R, red) cells treated with 3nM insulin at 4°C. Peak area  
200 quantification is reported for two insulin peptides: GIVEQCCTSICSLYQLENYCN (insulin  
201 A-chain) and GFFYTPK (insulin B-chain). 3 biological replicates were analyzed. Individual  
202 values are reported, bar graph represents mean +/- SEM. Unpaired two-sided t-test was  
203 used for statistical analysis. Source data are provided as a Source Data file.

204  
205  
206  
207

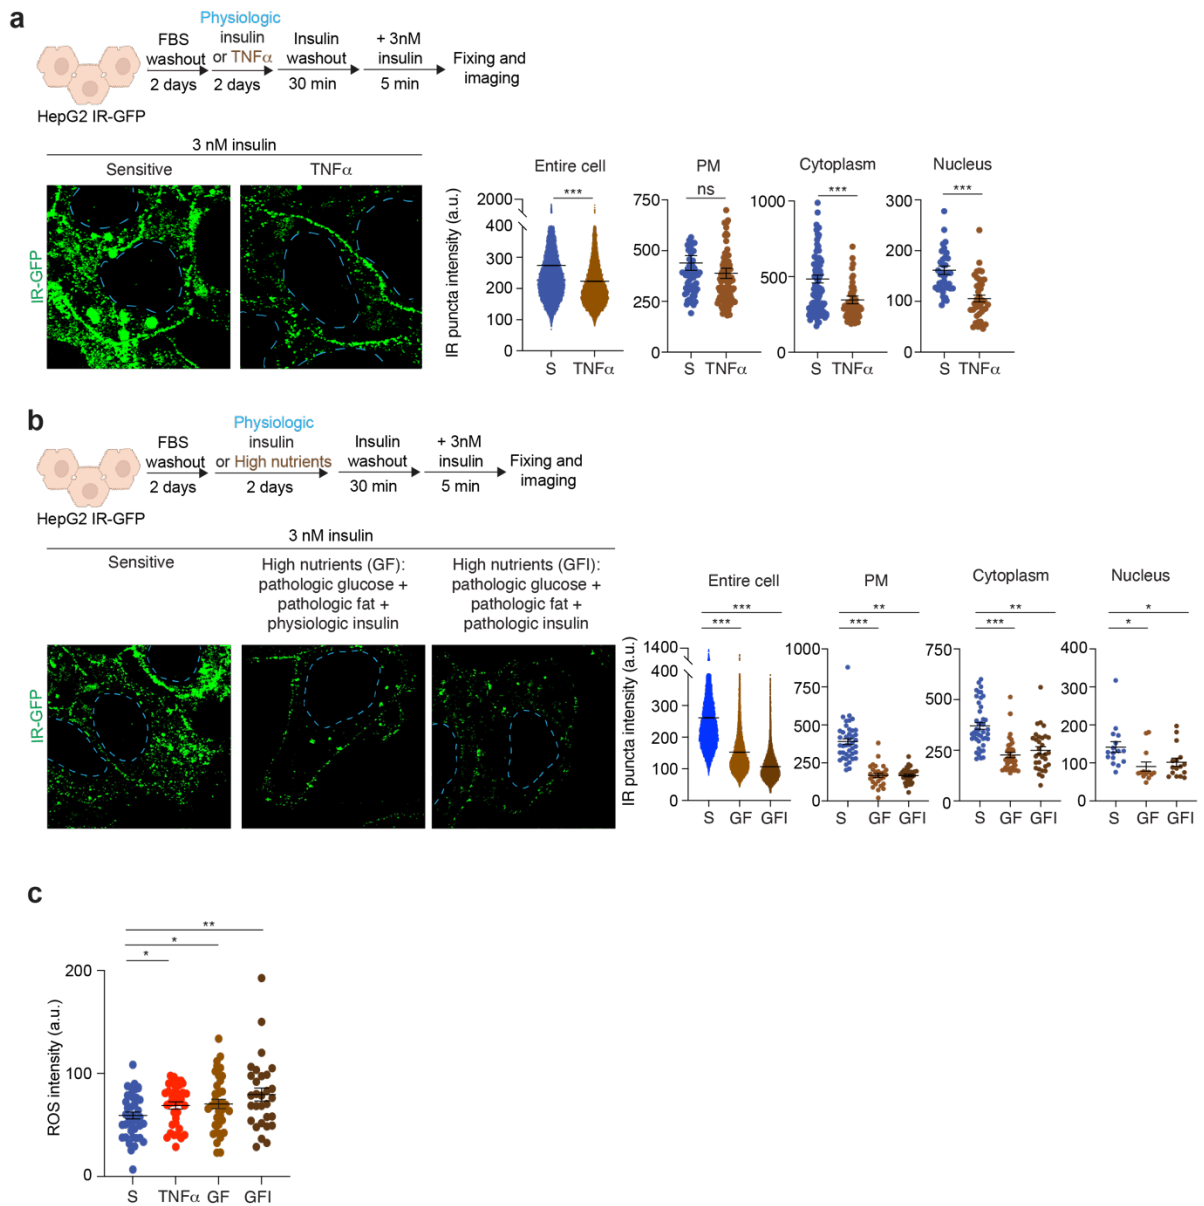

208

209

210

211

212

213

214

215

216

217

**Supplementary Fig. 7. Other models of insulin resistance.** **a**, Schematic of cell treatments (top). Imaging of IR-GFP in HepG2 cells treated with physiological concentrations of insulin (Sensitive, S, blue) or pathological concentration of  $\text{TNF}\alpha$  ( $\text{TNF}\alpha$ , brown) and acutely stimulated with 3nM insulin for 5 minutes (bottom left). Quantification of IR signal intensity in IR puncta in the entire cell (automated quantification, without specifying cellular subcompartments), at the plasma membrane (PM), cytoplasm or nucleus of cells (bottom right). In the graph individual values and the mean  $\pm$  SEM are reported. Number of IR puncta analyzed: Entire cell Sensitive 29,398 puncta,  $\text{TNF}\alpha$  31,083 puncta; Plasma membrane Sensitive 66 puncta,  $\text{TNF}\alpha$  112 puncta;

218 Cytoplasm Sensitive 109 puncta, TNF $\alpha$  76 puncta; Nucleus Sensitive 40 puncta, TNF $\alpha$   
219 40 puncta. Unpaired two-sided t-test was used for statistical analysis. **b**, Schematic of  
220 cell treatments (top). Imaging of IR-GFP in HepG2 cells treated with physiological  
221 concentrations of insulin (Sensitive, S, blue) or with high nutrients (either 1) pathological  
222 concentrations of glucose and fat and physiological concentration of insulin (high  
223 nutrients, GF, brown) or 2) pathological concentrations of glucose, fat and insulin (high  
224 nutrients, GFI, dark brown) and acutely stimulated with 3nM insulin for 5 minutes (bottom  
225 left). Quantification of IR signal intensity in IR puncta in the entire cell (automated  
226 quantification, without specifying cellular subcompartments), at the plasma membrane  
227 (PM), cytoplasm or nucleus of cells (bottom right). In the graph, individual values and the  
228 mean +/- SEM are reported. Number of IR puncta analyzed: Entire cell Sensitive 21,382  
229 puncta, GF 17,715 puncta, GFI 20,514 puncta; Plasma membrane Sensitive 42 puncta,  
230 GF 29 puncta, GFI 32 puncta; Cytoplasm Sensitive 44 puncta, GF 41 puncta, GFI 31  
231 puncta; Nucleus Sensitive 16 puncta, GF 13 puncta, GFI 16 puncta. Unpaired two-sided  
232 t-test was used for statistical analysis. **c**, ROS intensity in insulin-sensitive HepG2 cells  
233 (blue), in cells treated with TNF $\alpha$  (red), or in cells treated with high nutrients (either 1)  
234 pathological concentrations of glucose and fat and physiological concentration of insulin  
235 (GF, brown) or 2) pathological concentrations of glucose, fat and insulin (GFI, dark  
236 brown). Physiological concentration of insulin corresponds to 0.1nM, pathological  
237 concentration of insulin corresponds to 3nM, pathological concentration of TNF $\alpha$   
238 corresponds to 100pg/ml, pathological concentration of fat corresponds to 30 $\mu$ M palmitic  
239 acid and 45 $\mu$ M oleic acid, pathological concentration of glucose corresponds to 10mM. In  
240 the graph, individual values and the mean +/- SEM are reported. Number of cells  
241 analyzed: Sensitive 42 cells, TNF $\alpha$  35 cells, GF 36 cells, GFI 30 cells. Unpaired two-sided  
242 t-test was used for statistical analysis. Source data are provided as a Source Data file.

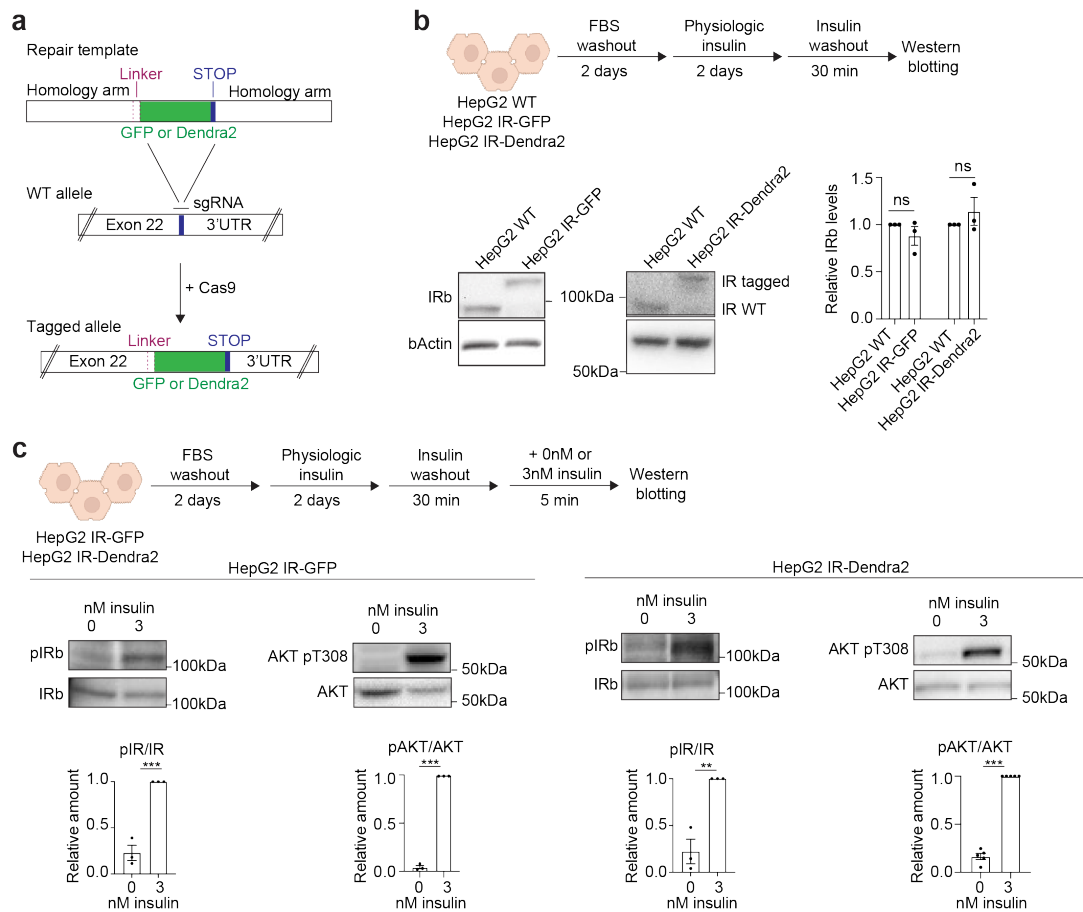

243

244

245

246

247

248

249

250

251

252

253

254

255

256

257

**Supplementary Fig. 8. Homozygous HepG2 cell lines expressing functional endogenous IR tagged with GFP or Dendra2.** **a**, Schematic of knock-in strategy. **b**, Schematic of cell treatments (top). Immunoblot for IRbeta (IRb) and beta-actin (bActin) control in WT, IR-GFP and IR-Dendra2 cell lines (bottom left). The shift in molecular weight is the expected size for the GFP or Dendra2 fusion with IR. Quantitation of IRb levels (bottom right). Individual values are reported and the bar graphs represent mean +/- SEM. 3 biological replicates were analyzed and unpaired two-sided t-test was used for statistical analysis. **c**, Schematic of cell treatments (top). Immunoblot with quantitation to measure phosphorylated insulin signaling proteins (pIRb and pAKT) over total insulin signaling proteins (IRb and AKT) in IR-GFP and IR-Dendra2 cells stimulated with 0nM or 3nM insulin for 5 minutes (bottom). Individual values are reported and the bar graphs represent mean +/- SEM. 3 biologically independent replicates were analyzed for pIRb/IRb in HepG2 IR-GFP cells and HepG2 IR-Dendra2 cells. 3 biologically independent replicates were analyzed for pAKT/AKT in IR-GFP cells and 4 biologically independent

258 replicates were analyzed for pAKT/AKT in IR-Dendra2 cells. Unpaired two-sided t-test  
259 was used for statistical analysis. Source data are provided as a Source Data file.  
260



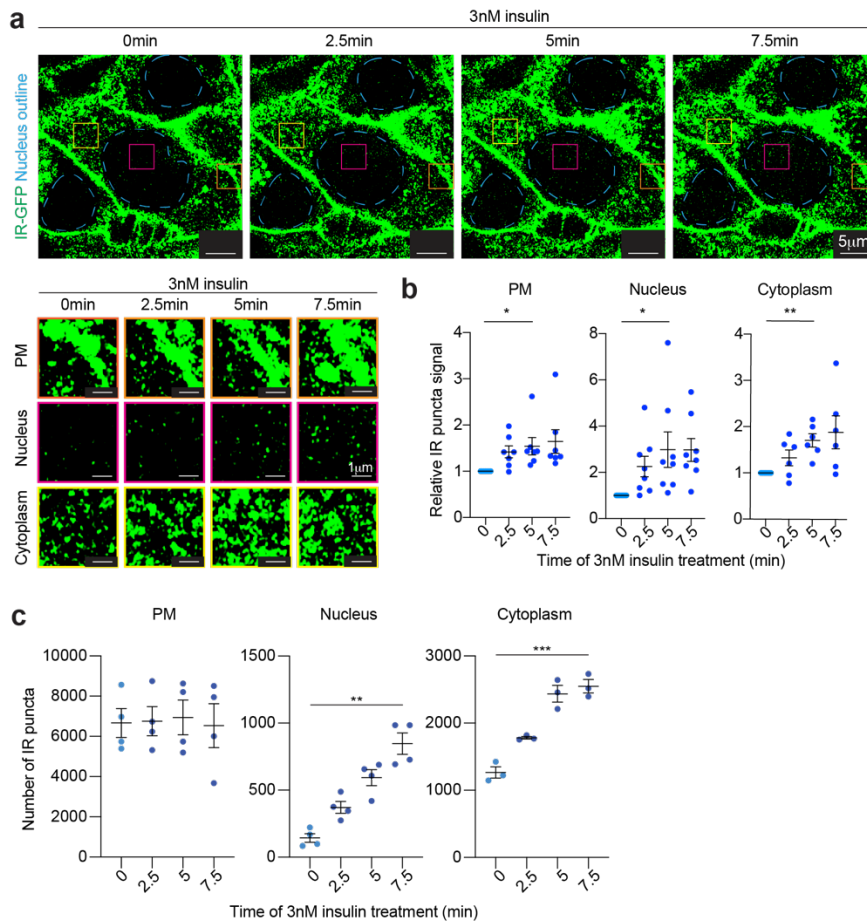

261

262

263

264

265

266

267

268

269

270

271

272

273

274

275

276

**Supplementary Fig. 9. Live-cell imaging of IR puncta in HepG2 cells.** **a**, Live imaging time course of HepG2 cells expressing endogenous IR tagged with GFP during insulin stimulation. Time of acquisition is reported above images. Dashed light blue lines represent nuclear outline and scale bar are indicated in the images. Representative images of three cells (top). Orange, magenta and yellow boxes represent regions at the plasma membrane (PM), nucleus and cytoplasm, respectively, that are magnified at the bottom. If the fluorescence made the scale bar hard to see, a black box was added behind the scale bar. **b**, Quantification of IR puncta signal at the plasma membrane (PM), nucleus and cytoplasm of IR-GFP cells stimulated with 3nM insulin for 0, 2.5, 5 and 7.5 minutes. Data is represented as “relative to 0 minutes”. In the graphs, individual values and the mean +/- SEM are reported. Number of regions analyzed: Plasma membrane 7 regions, Cytoplasm 6 regions, Nucleus 8 regions. Unpaired two-sided t-test was used for statistical analysis. **c**, Quantification of number of IR puncta at the plasma membrane (PM), nucleus and cytoplasm of IR-GFP cells stimulated with 3nM insulin for 0, 2.5, 5 and 7.5 minutes. In the graphs, individual values and the mean +/- SEM are reported. Number of cells

277 analyzed: Plasma membrane 4 cells, Cytoplasm 3 cells, Nucleus 4 cells. Unpaired two-  
278 sided t-test was used for statistical analysis. Source data are provided as a Source Data  
279 file.

280

281

282

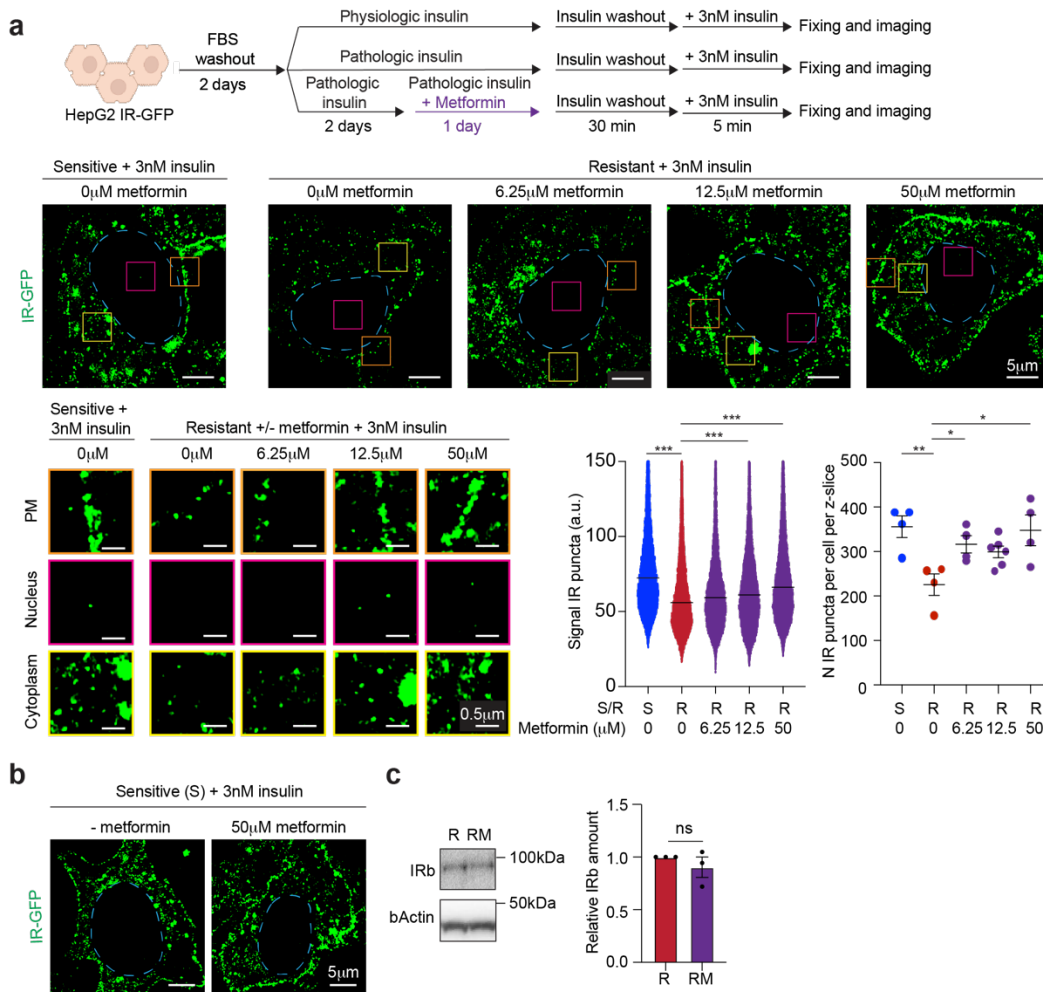

283

284

285

286

287

288

289

290

291

292

293

294

295

296

**Supplementary Fig. 10. Metformin effect on IR puncta.** **a**, Schematic of cell treatments (top). Imaging of IR-GFP in insulin-sensitive and insulin-resistant cells treated with or without metformin (middle). Metformin concentration is reported above the images. IR-GFP fluorescence signal is shown in green. Dashed light blue lines represent nuclear outline. Orange, magenta and yellow boxes represent regions at the plasma membrane (PM), nucleus and cytoplasm, respectively, that are magnified (bottom left). Scale bars are indicated in the images. This is the same experiment as in Fig. 2d and thus the same images for insulin-sensitive cells, insulin-resistant cells and insulin-resistant cells treated with 12.5 $\mu$ M metformin are reported in Fig. 2d. Quantification of IR signal in puncta (automated quantification) and the number of IR puncta in insulin-sensitive (blue) or insulin-resistant cells treated with (purple) or without metformin (red) (bottom right). In the graphs, individual values and the mean  $\pm$  SEM are reported. Number of IR puncta analyzed: Sensitive 13,128 puncta, Resistant 14,327 puncta, Resistant 6.25 $\mu$ M

297 Metformin 12,948 puncta, Resistant 12.5 $\mu$ M Metformin 13,867 puncta, Resistant 50 $\mu$ M  
298 Metformin 20,817 puncta. Number of cells analyzed to quantitate the number of IR puncta  
299 per cell: Sensitive 4 cells, Resistant 4 cells, Resistant 6.25 $\mu$ M Metformin 4 cells, Resistant  
300 12.5 $\mu$ M Metformin 6 cells, Resistant 50 $\mu$ M Metformin 4 cells. Unpaired two-sided t-test  
301 was used for statistical analysis. **b**, Imaging of IR-GFP in insulin-sensitive cells treated  
302 with or without 50 $\mu$ M metformin and acutely stimulated with 3nM insulin for 5 minutes.  
303 Dashed light blue lines represent nuclear outline. **c**, Immunoblot for IRbeta (IRb) and  
304 beta-actin (bActin) in cells cultured in pathologic levels of insulin treated with (RM) or  
305 without (R) 12.5 $\mu$ M metformin (left). Quantification of relative levels of IRb in insulin-  
306 resistant cells (red) and insulin-resistant cells treated with metformin (purple) (right). 3  
307 biological replicates were analyzed. In the graph, individual values and the mean +/- SEM  
308 are reported. Unpaired two-sided t-test was used for statistical analysis. Source data are  
309 provided as a Source Data file.  
310  
311

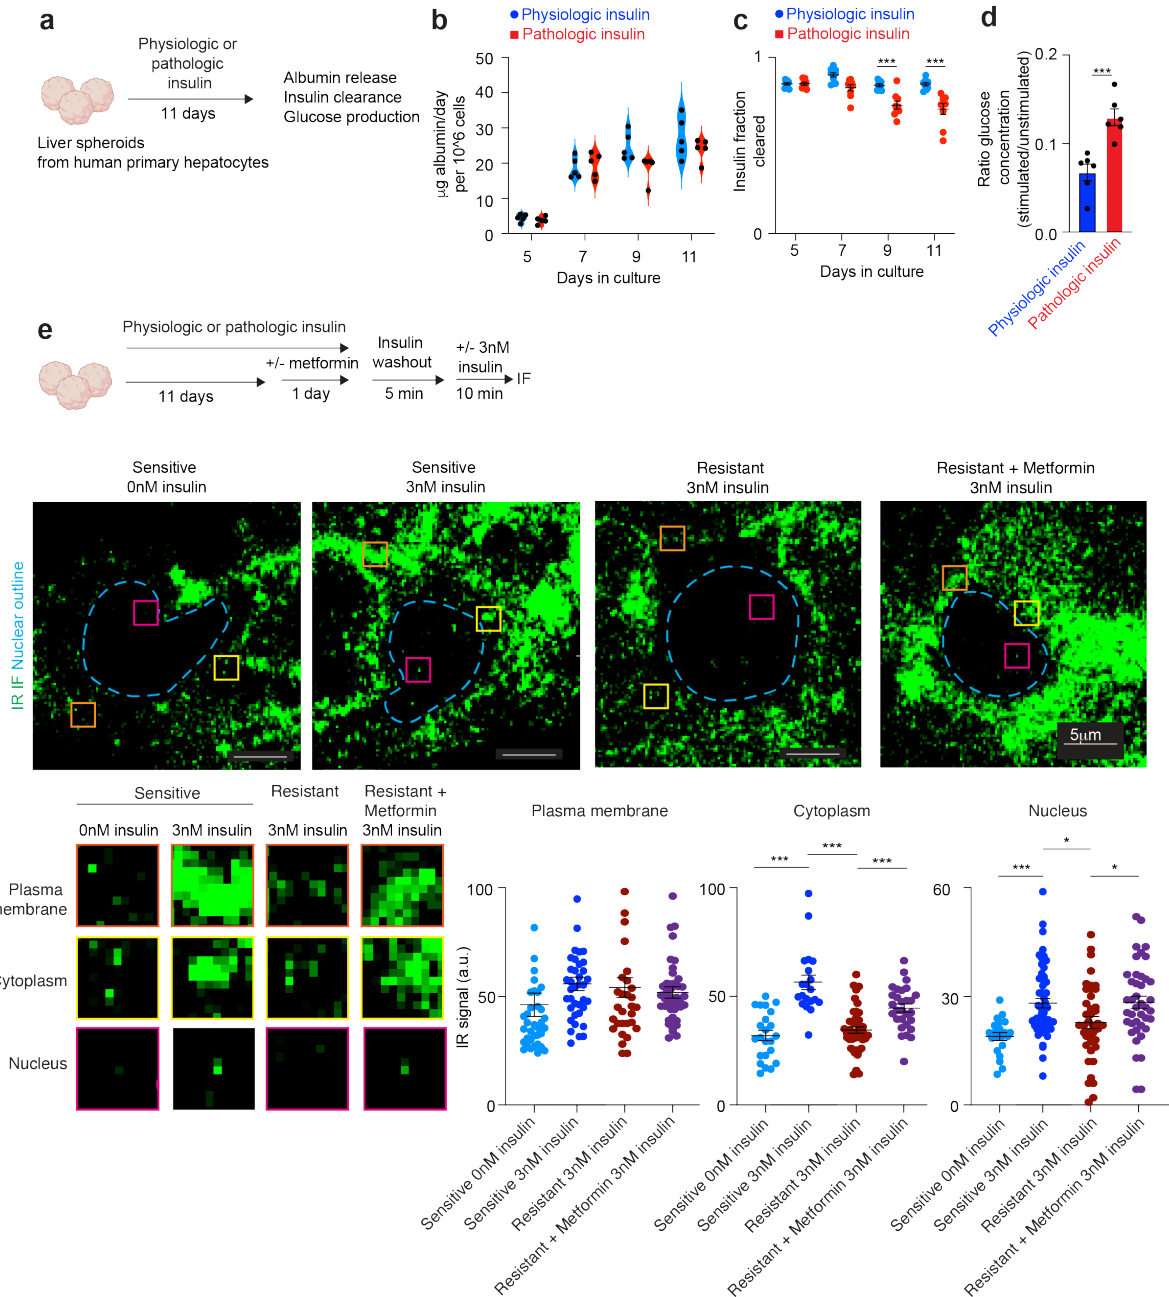

312

313

314

315

316

317

318

319

**Supplementary Fig. 11. IR puncta in human primary hepatocytes, a**, Schematic of cell treatments. **b**, Enzyme-linked immunoassay (ELISA) quantification of albumin production by human liver spheroids cultured with physiologic (blue) or pathologic (red) concentrations of insulin. Individual values are reported in the graph. 5 biological replicates were analyzed. **c**, Enzyme-linked immunoassay (ELISA) quantification of insulin clearance by human liver spheroids cultured with physiologic (blue) or pathologic (red) concentrations of insulin. Individual values and the mean +/- SEM are reported in

320 the graph. 9 biological replicates were analyzed and unpaired two-sided t-test was used  
321 for statistical analysis. **d**, Quantification of glucose production in human liver spheroids  
322 cultured with physiologic (blue) or pathologic (red) concentrations of insulin. Individual  
323 values and the mean  $\pm$  SEM are reported in the graph. 6 biological replicates were  
324 analyzed and unpaired two-sided t-test was used for statistical analysis. **e**, Schematic of  
325 cell treatments (top). Immunofluorescence for IR in insulin-sensitive, insulin-resistant and  
326 metformin-treated insulin-resistant human liver spheroids acutely treated with 0nM or 3nM  
327 insulin for 10 minutes (middle). Dashed light blue lines represent nuclear outline. Orange,  
328 yellow and magenta boxes represent regions at the plasma membrane, cytoplasm and  
329 nucleus, respectively, that are magnified (bottom left). Quantification of IR signal at IR  
330 puncta at the plasma membrane, cytoplasm and nucleus of insulin-sensitive hepatocytes  
331 (light blue), insulin-sensitive hepatocytes acutely stimulated with insulin (blue), insulin-  
332 resistant hepatocytes acutely stimulated with insulin (red) and insulin-resistant  
333 hepatocytes treated with metformin and acutely stimulated with insulin (purple) (bottom  
334 right). Individual values and the mean  $\pm$  SEM are reported in the graph. Number of IR  
335 puncta analyzed: Sensitive 0nM insulin Plasma membrane 37 puncta, Cytoplasm 23  
336 puncta, Nucleus 21 puncta; Sensitive 3nM insulin Plasma membrane 38 puncta,  
337 Cytoplasm 20 puncta, Nucleus 55 puncta; Resistant 3nM insulin Plasma membrane 32  
338 puncta, Cytoplasm 46 puncta, Nucleus 41 puncta; Resistant + Metformin 3nM insulin  
339 Plasma membrane 45 puncta, Cytoplasm 29 puncta, Nucleus 41 puncta. Unpaired two-  
340 sided t-test was used for statistical analysis. If the fluorescence made the scale bar hard  
341 to see, a black box was added behind the scale bar. Source data are provided as a Source  
342 Data file.

343  
344  
345

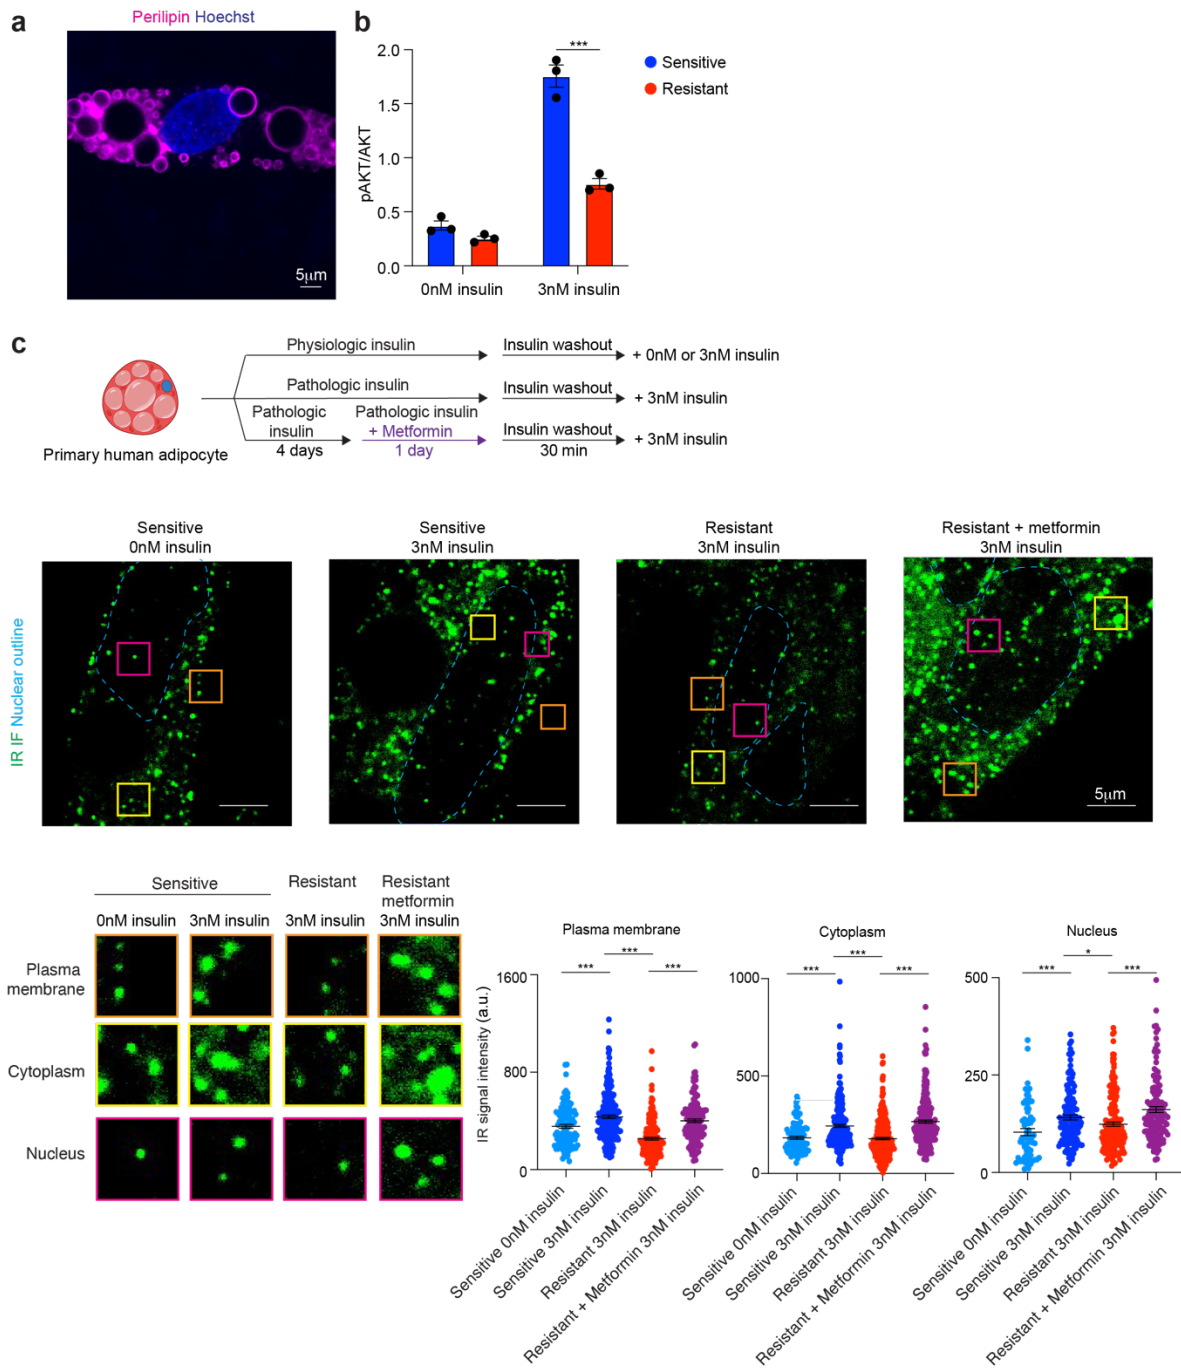

346

347

348

349

350

351

352

353

**Supplementary Fig. 12. IR puncta in human primary adipocytes.** **a**, Representative immunofluorescence image of perilipin (magenta) in human primary adipocyte. Nucleus is counterstained using Hoechst. **b**, Enzyme-linked immunoassay (ELISA) quantification of pAKT over AKT in human primary adipocytes treated with physiological (Sensitive, blue) or pathological (Resistant, red) concentrations of insulin for 5 days and acutely stimulated (3nM insulin) or not (0nM insulin) with insulin for 15 minutes. 3 biological replicates were analyzed. Individual values are reported in the graph and the bar graph

354 represent mean +/- SEM. Unpaired two-sided t-test was used for statistical analysis. **c**,  
355 Schematic of cell treatments (top). Immunofluorescence for IR in insulin-sensitive  
356 (Sensitive), insulin-resistant (Resistant) and metformin-treated insulin-resistant  
357 (Resistant + Metformin) human primary adipocytes acutely treated with 0nM or 3nM  
358 insulin for 5 minutes (middle). Orange, yellow and magenta boxes represent regions at  
359 the plasma membrane, cytoplasm and nucleus, respectively, that are magnified at the  
360 bottom left. Quantification of IR signal at IR puncta at the plasma membrane, cytoplasm  
361 and nucleus of insulin-sensitive adipocytes (light blue), insulin-sensitive adipocytes  
362 acutely stimulated with insulin (blue), insulin-resistant adipocytes acutely stimulated with  
363 insulin (red) and insulin-resistant adipocytes treated with metformin and acutely  
364 stimulated with insulin (purple) (bottom right). (bottom right). Individual values and the  
365 mean +/- SEM are reported in the graph. Number of IR puncta analyzed: Sensitive 0nM  
366 insulin Plasma membrane 107 puncta, Cytoplasm 91 puncta, Nucleus 67 puncta;  
367 Sensitive 3nM insulin Plasma membrane 209 puncta, Cytoplasm 238 puncta, Nucleus  
368 135 puncta; Resistant 3nM insulin Plasma membrane 178 puncta, Cytoplasm 274 puncta,  
369 Nucleus 187 puncta; Resistant + Metformin 3nM insulin Plasma membrane 148 puncta,  
370 Cytoplasm 279 puncta, Nucleus 129 puncta. Unpaired two-sided t-test was used for  
371 statistical analysis. Source data are provided as a Source Data file.

372

373

374

375

376

377



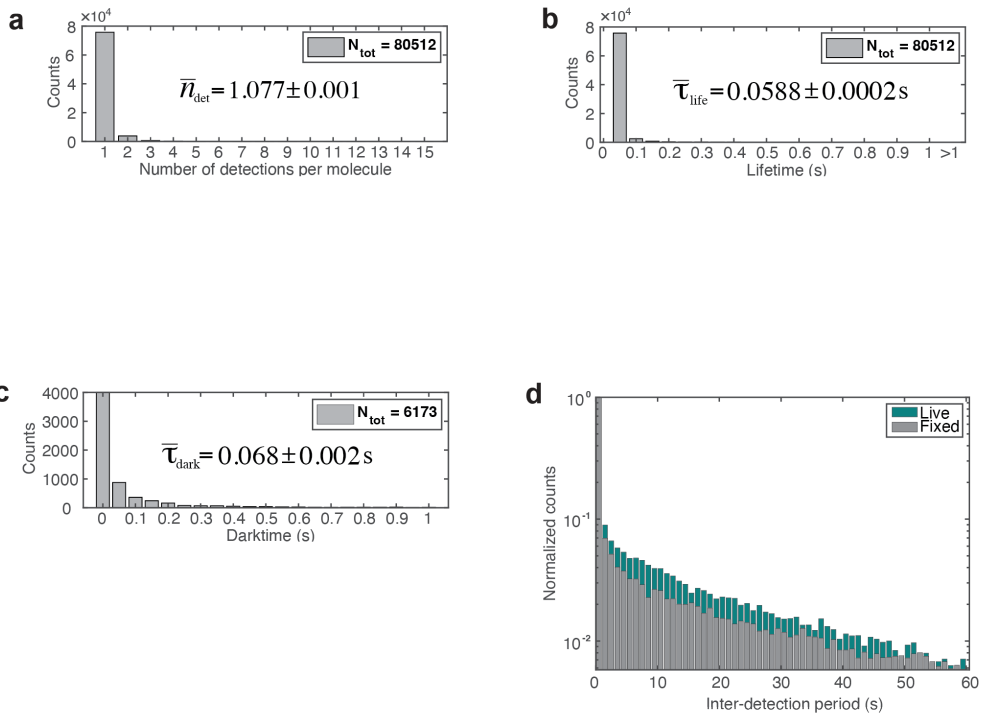

**e**

| Statistics of overall single molecule (SM)        | Live              | Fixed             | Units  |
|---------------------------------------------------|-------------------|-------------------|--------|
| Avg. number of detections per SM                  | $1.077 \pm 0.001$ | $1.204 \pm 0.004$ | counts |
| Avg. duration time of overall SM                  | $0.059 \pm 0.000$ | $0.075 \pm 0.001$ | second |
| Avg. inter-detection period of multi-detection SM | $0.068 \pm 0.002$ | $0.079 \pm 0.002$ | second |

**f**

| Statistics of identified multimolecule bursts     | AVG.             | STD. | Units  |
|---------------------------------------------------|------------------|------|--------|
| Number of identified bursts per 10,000 detections | $67.02 \pm 2.26$ |      | counts |
| Avg. duration time ("lifetime") of bursts         | $14.52 \pm 0.23$ |      | second |
| Avg. inter-detection period of bursts             | $1.43 \pm 0.02$  |      | second |
| Avg. number of detections per burst               | $22.46 \pm 0.78$ |      | counts |
| Lifetime of bursts — 0.05 quantile                | $0.85 \pm 0.03$  |      | second |
| Number of detections per burst — 0.05 quantile    | $4.00 \pm 0.00$  |      | counts |

  

| Statistics of outlier SM ( $t_{\text{min}}=0.85\text{s}$ , $n_{\text{min}}=4$ ) | AVG.            | STD. | Units  |
|---------------------------------------------------------------------------------|-----------------|------|--------|
| Number of false positive SM per 10,000 detections                               | $4.67 \pm 0.66$ |      | counts |
| Avg. duration time of false positive SM                                         | $1.21 \pm 0.06$ |      | second |
| Avg. inter-detection period of false positive SM                                | $0.24 \pm 0.02$ |      | second |
| Avg. number of detections per false positive SM                                 | $5.65 \pm 0.37$ |      | counts |

} TPR > 90%

378

379

380

381

382

383

384

**Supplementary Fig. 13. Single-molecule statistics and validation of tc-PALM analysis.** **a**, Distribution of the number of detections of single molecules in live cells. Total number of 80512 single molecules are collected for plotting the histogram. **b**, Distribution of the lifetime of single molecules. **c**, Distribution of the inter-detection period (dark-time) of single molecules with more than one detection. Total number of 6173 multi-detection

385 single molecules are collected for plotting the histogram. **d**, Histogram of inter-detection  
386 period of identified transient clusters in live cells and pseudo-transient clusters in fixed  
387 cells selected with the same procedure as in live cells. The counts of each bin are  
388 normalized to the first bin, which mostly consists of counts of blinking events from single  
389 molecules (given that most single molecules have a lifetime span shorter than 1s). **e**,  
390 Statistics of single molecules in live and fixed samples. **f**, Statistics of identified  
391 multimolecule bursts and outlier single molecules. Ideally, the true positive rate (TPR) can  
392 go beyond 90% based on the estimation of cut-offs (0.05 quantile) from real bursts.  
393 Source data are provided as a Source Data file.

394  
395  
396

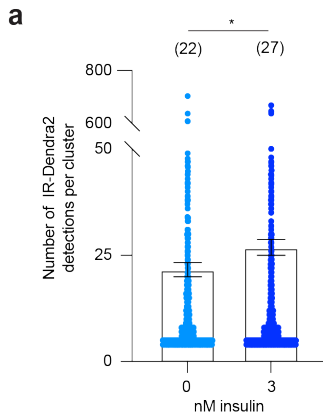

397 **Supplementary Fig. 14. IR-Dendra2 detections in clusters throughout the cell. a**,  
398 Quantification of the number of IR-Dendra2 detections per IR cluster in insulin-sensitive  
399 cells stimulated with (3nM, dark blue) and without (0nM, light blue) insulin for 5 minutes.  
400 Average number of IR-Dendra2 detections per IR cluster is reported in parenthesis on top  
401 of each histogram. Histograms represent mean +/- SEM. Number of clusters analyzed:  
402 Sensitive 0nM insulin 908 clusters, Sensitive 3nM insulin 1,116 clusters. Unpaired two-  
403 sided t-test was used for statistical analysis. Source data are provided as a Source Data  
404 file.

405  
406  
407  
408

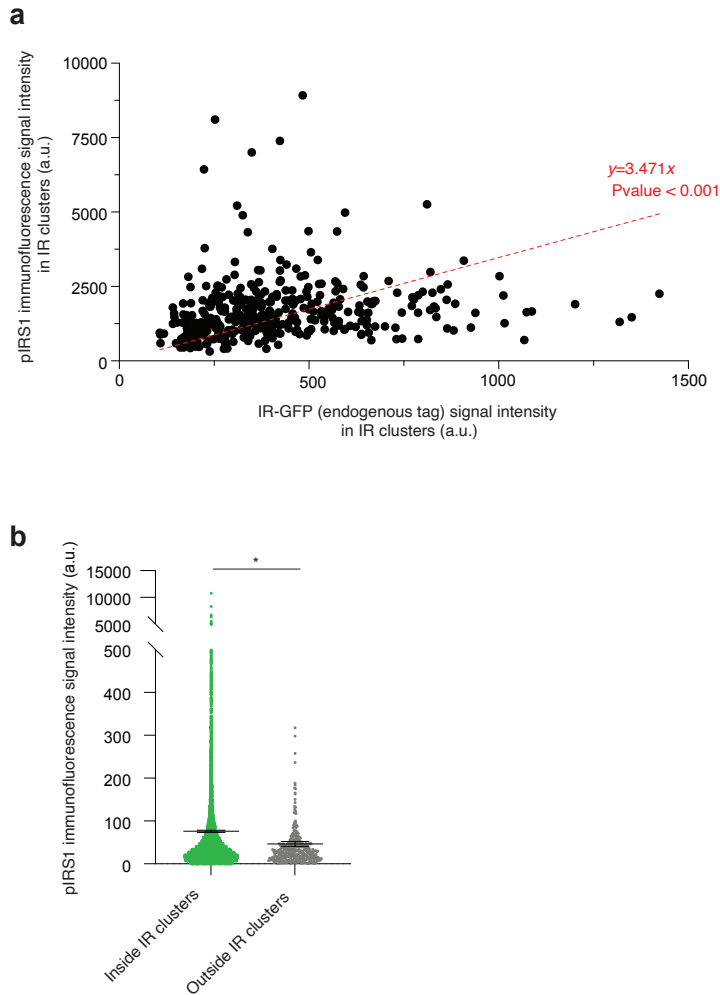

409  
410  
411  
412  
413  
414  
415  
416  
417  
418  
419  
420  
421

**Supplementary Fig. 15. Correlation between IR and pIRS1 signal intensity in clusters.** **a**, Quantification of pIRS1 and IR signal in clusters. To obtain IR clusters with different levels of IR molecules, HepG2 cells expressing endogenous IR tagged with GFP (IR-GFP) were treated with siControl or siRNA for INSR for 18 hours or 24 hours. 391 IR clusters were analyzed. Linear regression was used to generate trendline. Equation:  $y=3.47x$ . **b**, Quantification of pIRS1 signal inside (green) and outside (grey) IR clusters. Individual values and the mean +/- SEM are reported in the graph. 12,447 IR clusters and 397 regions outside of IR clusters were analyzed. Unpaired two-sided t-test was used for statistical analysis. Source data are provided as a Source Data file.

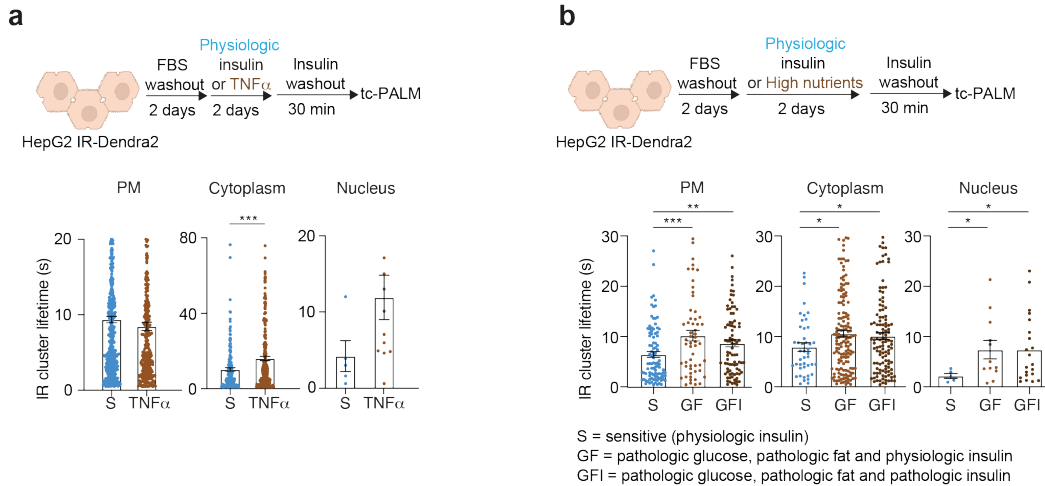

422

423

**Supplementary Fig. 16. Increased IR cluster lifetime by inflammation and high**

424

**nutrients. a**, Schematic of cell treatments (top). Tc-PALM quantification of IR cluster

425

lifetime at the plasma membrane (PM), cytoplasm and nucleus in HepG2 cells expressing

426

IR-Dendra2 treated with physiological concentrations of insulin (Sensitive, S, light blue)

427

or pathological concentration of TNF $\alpha$  (TNF $\alpha$ , brown). Individual values and the mean +/-

428

SEM are reported in the graph. Number of short-lived clusters analyzed: Plasma

429

membrane Sensitive 440 clusters, TNF $\alpha$  307 clusters; Cytoplasm Sensitive 170 clusters,

430

TNF $\alpha$  212 clusters; Nucleus Sensitive 5 clusters, TNF $\alpha$  22 clusters. Unpaired two-sided

431

t-test was used for statistical analysis. **b**, Schematic of cell treatments (top). Tc-PALM

432

quantification of IR cluster lifetime at the plasma membrane (PM), cytoplasm and nucleus

433

in HepG2 cells expressing IR-Dendra2 treated with physiological concentrations of insulin

434

(Sensitive, S, light blue) or with high nutrients either 1) pathological concentrations of

435

glucose and fat and physiological concentration of insulin (high nutrients, GF, brown) or

436

2) pathological concentrations of glucose, fat and insulin (high nutrients, GFI, dark brown).

437

Physiological concentration of insulin corresponds to 0.1nM, pathological concentration

438

of insulin corresponds to 3nM, pathological concentration of TNF $\alpha$  corresponds to

439

100pg/ml, pathological concentration of fat corresponds to 30 $\mu$ M palmitic acid and 45 $\mu$ M

440

oleic acid, pathological concentration of glucose corresponds to 10mM. Number of short-

441

lived clusters analyzed: Plasma membrane Sensitive 97 clusters, GF 56 clusters, GFI 85

442

clusters; Cytoplasm Sensitive 44 clusters, GF 148 clusters, GFI 117 clusters; Nucleus

443

Sensitive 5 clusters, GF 12 clusters, GFI 21 clusters. Unpaired two-sided t-test was used

444

for statistical analysis (Plasma membrane Sensitive vs GF, Sensitive vs GFI; Cytoplasm

445 Sensitive vs GF) or unpaired one-sided t-test was used for statistical analysis for  
 446 cytoplasm Sensitive vs GF and nucleus Sensitive vs GF, Sensitive vs GF. Source data  
 447 are provided as a Source Data file.

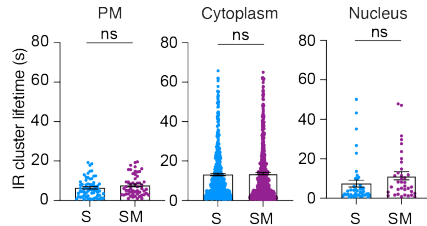

448 **Supplementary Fig. 17. Metformin does not decrease IR cluster lifetime in insulin-**  
 449 **sensitive cells.** Tc-PALM quantification of IR cluster lifetime at the plasma membrane  
 450 (PM), cytoplasm and nucleus in insulin-sensitive HepG2 cells expressing IR-Dendra2  
 451 treated with (purple) and without 12.5 $\mu$ M metformin (light blue) for 1 day. Data is  
 452 represented as mean  $\pm$  SEM. Number of IR short-lived clusters analyzed: Sensitive (S)  
 453 Plasma membrane 310 clusters, Cytoplasm 456 clusters, Nucleus 43 clusters; Sensitive  
 454 + Metformin (SM) Plasma membrane 447 clusters, Cytoplasm 609 clusters, Nucleus 36  
 455 clusters. Unpaired two-sided t-test was used for statistical analysis.

457

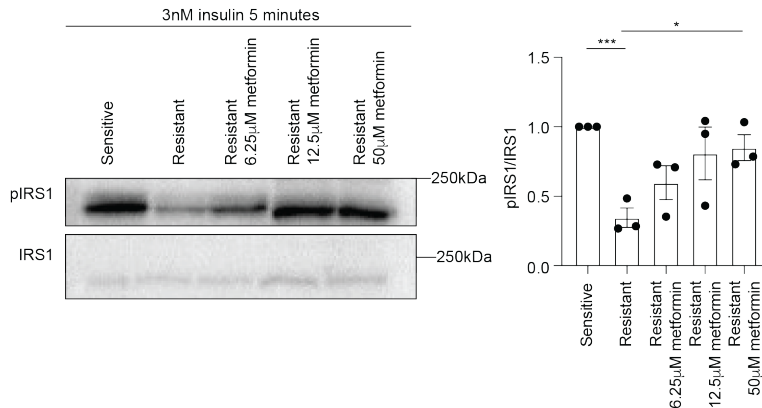

458 **Supplementary Fig. 18. Metformin partially rescues phosphorylation of IRS1.**  
 459 Immunoblot and quantification of pIRS1 over total IRS1 in insulin-sensitive, insulin-  
 460 resistant and metformin-treated insulin-resistant cells. Metformin concentrations used in  
 461 the experiment are reported in the image. Data is represented as single values and bar  
 462 graphs (mean  $\pm$  SEM). Three biological replicates were analyzed. Unpaired two-sided  
 463 t-test was used for statistical analysis. Source data are provided as a Source Data file.

464

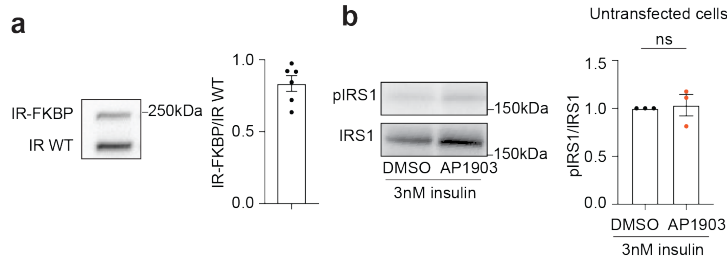

465

466

467

468

469

470

471

472

473

**Supplementary Fig. 19. Effect of AP1903 on HepG2 cells.** **a**, Immunoblot and quantification of the relative levels of expression of WT IR (IR WT) and IR-GFP-FKBP (IR-FKBP). Data is represented as single values and a bar graph (mean +/- SEM). 6 biological replicates were analyzed. **b**, Immunoblot and quantification of the relative levels of phosphorylated IRS1 and total IRS1 in untransfected, wildtype HepG2 cells treated with DMSO or AP1903. 3 biological replicates per condition were analyzed. Data is represented as single values and bar graphs (mean +/- SEM). Unpaired two-sided t-test was used for statistical analysis. Source data are provided as a Source Data file.

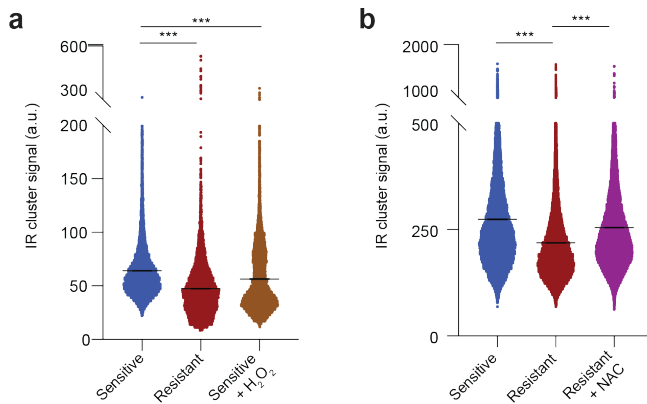

474

475

476

477

478

479

480

481

482

483

484

**Supplementary Fig. 20. Oxidative stress effect on IR incorporation into clusters.** **a**, Quantification of IR signal intensity in IR clusters in the entire cell (automated quantification, without specifying cellular subcompartments) relative to Fig. 5c. Data points from sensitive cells are represented in blue, data points from resistant cells are represented in dark red, data points from resistant cells treated with NAC are represented in dark red. Single values and mean +/- SEM are shown. Number of clusters analyzed: Sensitive 11,110 clusters, Resistant 8,861 clusters, Sensitive + H<sub>2</sub>O<sub>2</sub> 8,068 clusters. Unpaired two-sided t-test was used for statistical analysis. **b**, Quantification of IR signal intensity in IR clusters in the entire cell (automated quantification, without specifying cellular subcompartments) relative to Fig. 5e. Single values and mean +/- SEM are

485 shown. Number of clusters analyzed: Sensitive 29,398 clusters, Resistant 30,600  
 486 clusters, Resistant + NAC 46,992 clusters). Unpaired two-sided t-test was used for  
 487 statistical analysis. Source data are provided as a Source Data file.

488

| Healthy/T2D | Specimen ID   | Case ID | Age At Excision | Sex    | Ethnicity                         | Biosample Diagnosis | BMI   | Metformin Treatment | Source |
|-------------|---------------|---------|-----------------|--------|-----------------------------------|---------------------|-------|---------------------|--------|
| Healthy     | 1208572F      | 87808   | 77              | Female | Caucasian                         | Normal              | 23.14 | No                  | BioIVT |
| Healthy     | 1208568F      | 87808   | 77              | Female | Caucasian                         | Normal              | 23.14 | No                  | BioIVT |
| Healthy     | FHU-L-102319  | N/A     | 37              | Female | Caucasian                         | Normal              | 23.82 | No                  | BioIVT |
| Healthy     | AM-092        | N/A     | 29              | Female | Caucasian                         | Normal              | 24    | No                  | MGH    |
| Healthy     | 20-018/OL-001 | N/A     | 87              | Male   | Caucasian                         | Normal              | 23    | No                  | MGH    |
| Healthy     | 21-015/OL-035 | N/A     | 50              | Male   | N/A                               | Normal              | 25    | No                  | MGH    |
| Healthy     | AM-019/OL-028 | N/A     | 50              | Female | Caucasian                         | Normal              | 28    | No                  | MGH    |
| T2D         | 1214825F      | 99117   | 53              | Female | Caucasian                         | Steatosis           | 27.18 | No                  | BioIVT |
| T2D         | 1137920F      | 47111   | 70              | Male   | Caucasian                         | Steatosis           | 34.42 | No                  | BioIVT |
| T2D         | 1143147F      | 49893   | 76              | Female | N/A                               | Congestion          | 37.6  | No                  | BioIVT |
| T2D         | AM-026/OL-038 | N/A     | 70              | Male   | Caucasian                         | Steatosis           | 38    | No                  | MGH    |
| T2D         | 20-024/OL-004 | N/A     | 73              | Male   | Caucasian                         | Unknown             | 23    | No                  | MGH    |
| T2D         | OL-019        | N/A     | 73              | Male   | Caucasian                         | Steatosis           | 22    | No                  | MGH    |
| T2D         | 20210519      | N/A     | 62              | Male   | Hispanic                          | Congestion          | 36.6  | No                  | MGH    |
| T2D         | 1096575F      | 48612   | 66              | Male   | Caucasian                         | Steatosis           | 30.86 | Yes                 | BioIVT |
| T2D         | 1153543F      | 52473   | 77              | Female | Native American or Alaskan Native | Steatosis           | 25.7  | Yes                 | BioIVT |
| T2D         | 27534H1       | 14426   | 59              | Female | Caucasian                         | Steatosis           | 20.9  | Yes                 | BioIVT |
| T2D         | AM-011/OL-025 | N/A     | 54              | Male   | Caucasian                         | Steatosis           | 42    | Yes                 | MGH    |
| T2D         | OL-013        | N/A     | 72              | Male   | Caucasian                         | Steatosis           | 33.5  | Yes                 | MGH    |
| T2D         | 21-006/OL-029 | N/A     | 69              | Male   | Caucasian                         | Steatosis           | 31.5  | Yes                 | MGH    |
| T2D         | 21-134/OL-063 | N/A     | 67              | Male   | Caucasian                         | Steatosis           | 31    | Yes                 | MGH    |
| T2D         | 20-054/OL-024 | N/A     | 41              | Male   | Caucasian                         | Steatosis           | 36    | Yes                 | MGH    |
| T2D         | 21-088/OL-052 | N/A     | 69              | Female | Caucasian                         | Steatosis           | 28    | Yes                 | MGH    |

489

490

**Supplementary Table 1. Donor characteristics.**

491 **SUPPLEMENTAL TEXT**

492

493 Photochemistry of single Dendra2 molecules

494

495 Given that there could be an ambiguous mapping from the number of detections to the  
496 number of Dendra2 molecules, several control analyses of the single molecule photochemistry  
497 have to be done to validate the statistics of the real clusters (which ideally consist of colocalized,  
498 time-correlated, multimolecule bursts). Imaging of IR in either fixed or live IR-Dendra2 cells was  
499 performed in L-15 medium using the same laser setups as described above. After the same ROI  
500 was imaged for a long time, most Dendra2 molecules were photo-converted and bleached,  
501 whereupon the rest of intact single molecules were sparsely photo-converted and recorded, and  
502 the consequent colocalized detections from the same molecule can be well spatiotemporally  
503 isolated and grouped. The statistics of live-cell Dendra2 single molecules are shown in  
504 Supplementary Figure 13a-c. The comparisons of Dendra2 single molecules in live and fixed  
505 samples are shown in Supplementary Figure 13e. 94% of the single molecules only generate one  
506 detection (Supplementary Fig. 13a), which results in the average number of detections per  
507 molecule being close to one ( $\bar{n}_{\text{det}} \approx 1.077$ ). The average lifetime of single molecules is 0.059s,  
508 and only 1% of them has a lifetime longer than 0.25s (Supplementary Fig. 13b). Among those  
509 multiple-detection molecules, 65% of them result in the same emitting event occupying two  
510 adjacent frames (Supplementary Fig. 10c), and the real average dark-time between blinking  
511 events is around 0.2s.

512

513 Validation of the existence of dynamic clustering in live cells

514

515 We identified pseudo-transient clusters in fixed cells with the exact procedures and criteria  
516 as for searching transient clusters in live cells. For spatially clustered structures, significantly  
517 larger dark times in live cells, compared to fixed cells under identical condition, is a sign of the  
518 bursting dynamics in live cells<sup>8</sup>. This is exactly what we observed (Supplementary Fig. 13d), and  
519 such larger dark times of clusters in live cells cannot be explained by longer intrinsic inter-  
520 detection period of Dendra2 single molecules in live-cell samples (Supplementary Fig. 13e).  
521 Furthermore, we normalized the number of tc-PALM identified bursts by the total number of  
522 detections of the same ROI, thus are able to estimate the number of identified bursts per 10,000  
523 detections as 67.02 (Supplementary Fig. 13f). Meanwhile, among the tc-PALM identified bursts,  
524 we obtained the number of detections and lifetime of the 0.05 quantile at the lower-bound side as



525 4 and 0.85s, respectively (Supplementary Fig. 13f). If we use these two numbers as the cut-off  
526 for the set of Dendra2 single molecules we measured in live samples, only 4.67 molecules among  
527 10,000 detections can pass the threshold. This indicates that the true positive rate (TPR) can  
528 easily go beyond 90%:  $67.02 \div (67.02 + 4.67) = 93.5\%$ ; even in the worst case (all the bursts below  
529 the 0.05 quantile were single molecules), the corresponding TPR is  $93.5\% \times 95\% \approx 89\%$ . Even for  
530 the outlier single molecules that pass the cut-off, their statistics (including duration time, inter-  
531 detection period, and number of detections) are still quite different from the of tc-PALM identified  
532 bursts (Supplementary Fig. 13f). In another extreme test, we applied several additional high cut-  
533 offs to the tc-PALM identified bursts (in some cases, the TPR was pushed to 98%), whereupon  
534 we are still able to recapitulate all the significant trends of lifetime-shifting in cytoplasm and nuclei  
535 after different perturbations. This observation is reasonable: given that IR molecules are much  
536 less abundant in the cytoplasm and nuclei, un-clustered background of randomly bound IR  
537 molecules can be safely ignored. Therefore, any time-corelated, multi-detection events inside in  
538 the cytoplasm or nuclei are very likely to result from real clusters, which are insensitive to the FPR  
539 cut-off. Gathering all these evidences together, we are able to validate the existence of multi-  
540 molecule dynamical clustering of IR molecules in live cells, which yields transient bursting  
541 dynamics with distinct properties than single molecules and are robustly, physiologically  
542 responsive.

543

544

545

## SUPPLEMENTARY REFERENCES

- 546 1. Ramakrishnan G, Arjuman A, Suneja S, Das C, Chandra NC. The association  
547 between insulin and low-density lipoprotein receptors. *Diab Vasc Dis Res* **9**, 196-  
548 204 (2012).  
549
- 550 2. Hancock ML, *et al.* Insulin Receptor Associates with Promoters Genome-wide and  
551 Regulates Gene Expression. *Cell* **177**, 722-736 e722 (2019).  
552
- 553 3. Foretz M, Guichard C, Ferre P, Foufelle F. Sterol regulatory element binding  
554 protein-1c is a major mediator of insulin action on the hepatic expression of  
555 glucokinase and lipogenesis-related genes. *Proc Natl Acad Sci U S A* **96**, 12737-  
556 12742 (1999).  
557
- 558 4. Hillgartner FB, Salati LM, Goodridge AG. Physiological and molecular  
559 mechanisms involved in nutritional regulation of fatty acid synthesis. *Physiol Rev*  
560 **75**, 47-76 (1995).  
561
- 562 5. Fortez M, *et al.* ADD1/SREBP-1c is required in the activation of hepatic lipogenic  
563 gene expression by glucose. *Mol Cell Biol* **19**, 3760-3768 (1999).  
564
- 565 6. Claycombe KJ, *et al.* Insulin increases fatty acid synthase gene transcription in  
566 human adipocytes. *Am J Physiol* **274**, R1253-1259 (1998).  
567
- 568 7. Dif N, Euthine V, Gonnet E, Laville M, Vidal H, Lefai E. Insulin activates human  
569 sterol-regulatory-element-binding protein-1c (SREBP-1c) promoter through h SRE  
570 motifs. *Biochem J* **400**, 179-188 (2006).  
571
- 572 8. Cisse, II, *et al.* Real-time dynamics of RNA polymerase II clustering in live human  
573 cells. *Science* **341**, 664-667 (2013).  
574  
575  
576
